# Supplementary material for: Changes in the Quality and Microbial Communities of Precooked Seasoned Crayfish Tail Treated with Microwave and Biological Preservatives during Room Temperature Storage
Source: MDPI journal article supplement (doi:10.3390/foods13081256), 2024-04-19
Supplement: s1 [file s1]

**Table S1.** Volatile compounds identified in different periods of pre-cooked seasoned crayfish tail during storage at room temperature.

**Figure S1.** Permutation test of OPLS-DA model.

**Figure S2.** Hierarchical clustering analysis of the bacteria in pre-cooked seasoned crayfish tail during storage at room temperature.

**Figure S3.** Relative abundance of KEGG metabolic pathways in pre-cooked seasoned crayfish tail with different treatments during storage at room temperature.

**Table S1:** Volatile compounds identified in different periods of pre-cooked seasoned crayfish tail during storage at room temperature.

|    | Compounds                | CAS#     | Formula                                       | MW    | RI     | Rt [sec] | VIP      |
|----|--------------------------|----------|-----------------------------------------------|-------|--------|----------|----------|
| 1  | Citral                   | 5392405  | C <sub>10</sub> H <sub>16</sub> O             | 152.2 | 1711.4 | 1324.688 | 0.803546 |
| 2  | Camphor                  | 76222    | C <sub>10</sub> H <sub>16</sub> O             | 152.2 | 1511.2 | 983.02   | 1.38035  |
| 3  | Acetic acid-M            | 64197    | C <sub>2</sub> H <sub>4</sub> O <sub>2</sub>  | 60.1  | 1397.9 | 830.256  | 1.61889  |
| 4  | Acetic acid-D            | 64197    | C <sub>2</sub> H <sub>4</sub> O <sub>2</sub>  | 60.1  | 1394.9 | 825.328  | 0.792033 |
| 5  | (E)-2-Octenal            | 2548870  | C <sub>8</sub> H <sub>14</sub> O              | 126.2 | 1396.7 | 828.613  | 1.56695  |
| 6  | (Z)-Hex-3-en-1-ol-M      | 928961   | C <sub>6</sub> H <sub>12</sub> O              | 100.2 | 1362.9 | 767.889  | 0.866588 |
| 7  | (Z)-Hex-3-en-1-ol-D      | 928961   | C <sub>6</sub> H <sub>12</sub> O              | 100.2 | 1362.8 | 767.708  | 0.399673 |
| 8  | 6-Methyl-5-hepten-2-one  | 110930   | C <sub>8</sub> H <sub>14</sub> O              | 126.2 | 1347.6 | 742.044  | 0.623641 |
| 9  | (E)-2-Heptenal           | 18829555 | C <sub>7</sub> H <sub>12</sub> O              | 112.2 | 1318.7 | 695.179  | 0.987433 |
| 10 | (Z)-3-Hexenyl acetate    | 3681718  | C <sub>8</sub> H <sub>14</sub> O <sub>2</sub> | 142.2 | 1312.6 | 685.695  | 1.19942  |
| 11 | Propyl hexanoate         | 626777   | C <sub>9</sub> H <sub>18</sub> O <sub>2</sub> | 158.2 | 1316.9 | 692.39   | 1.05472  |
| 12 | 2,5-Dimethylpyrazine     | 123320   | C <sub>6</sub> H <sub>8</sub> N <sub>2</sub>  | 108.1 | 1318.3 | 694.621  | 0.763298 |
| 13 | p-Cymene                 | 99876    | C <sub>10</sub> H <sub>14</sub>               | 134.2 | 1312.6 | 685.695  | 0.856795 |
| 14 | 1-Hydroxy-2-propanone    | 116096   | C <sub>3</sub> H <sub>6</sub> O <sub>2</sub>  | 74.1  | 1304.9 | 673.978  | 0.530654 |
| 15 | Furfural                 | 98011    | C <sub>5</sub> H <sub>4</sub> O <sub>2</sub>  | 96.1  | 1445.3 | 891.006  | 0.606791 |
| 16 | Terpinolene              | 586629   | C <sub>10</sub> H <sub>16</sub>               | 136.2 | 1272.7 | 614.84   | 0.534729 |
| 17 | Z-2-penten-1-ol          | 1576950  | C <sub>5</sub> H <sub>10</sub> O              | 86.1  | 1270.7 | 610.934  | 0.590488 |
| 18 | 3-Methyl-3-buten-1-ol    | 763326   | C <sub>5</sub> H <sub>10</sub> O              | 86.1  | 1253.7 | 578.575  | 1.26208  |
| 19 | 3-Methyl-2-butenal       | 107868   | C <sub>5</sub> H <sub>8</sub> O               | 84.1  | 1223.1 | 524.707  | 1.03886  |
| 20 | gamma-Terpinene          | 99854    | C <sub>10</sub> H <sub>16</sub>               | 136.2 | 1229.3 | 535.301  | 1.6975   |
| 21 | Limonene-M               | 138863   | C <sub>10</sub> H <sub>16</sub>               | 136.2 | 1229.5 | 535.667  | 0.799781 |
| 22 | Limonene-D               | 138863   | C <sub>10</sub> H <sub>16</sub>               | 136.2 | 1229.3 | 535.301  | 0.614356 |
| 23 | (E)-2-Hexen-1-al         | 6728263  | C <sub>6</sub> H <sub>10</sub> O              | 98.1  | 1200.2 | 487.809  | 1.33343  |
| 24 | 3-Methylbutyl propanoate | 105680   | C <sub>8</sub> H <sub>16</sub> O <sub>2</sub> | 144.2 | 1198.3 | 484.881  | 1.46689  |
| 25 | p-Xylene                 | 106423   | C <sub>8</sub> H <sub>10</sub>                | 106.2 | 1154.4 | 425.412  | 0.839299 |
| 26 | 4-Methyl-3-penten-2-one  | 141797   | C <sub>6</sub> H <sub>10</sub> O              | 98.1  | 1147.8 | 417.194  | 0.891425 |
| 27 | (E)-2-Pentenal           | 1576870  | C <sub>5</sub> H <sub>8</sub> O               | 84.1  | 1147.9 | 417.355  | 0.931108 |
| 28 | delta-3-Carene-M         | 13466789 | C <sub>10</sub> H <sub>16</sub>               | 136.2 | 1133.8 | 400.434  | 0.8297   |
| 29 | delta-3-Carene-D         | 13466789 | C <sub>10</sub> H <sub>16</sub>               | 136.2 | 1134.7 | 401.401  | 0.622977 |
| 30 | 1-Butanol                | 71363    | C <sub>4</sub> H <sub>10</sub> O              | 74.1  | 1124.4 | 389.475  | 0.820509 |
| 31 | Isoamyl acetate          | 123922   | C <sub>7</sub> H <sub>14</sub> O <sub>2</sub> | 130.2 | 1125.3 | 390.442  | 0.315939 |
| 32 | Isobutanol-D             | 78831    | C <sub>4</sub> H <sub>10</sub> O              | 74.1  | 1097.3 | 359.662  | 1.00447  |
| 33 | Isobutanol-M             | 78831    | C <sub>4</sub> H <sub>10</sub> O              | 74.1  | 1092.1 | 356.323  | 0.676137 |
| 34 | beta-Pinene              | 127913   | C <sub>10</sub> H <sub>16</sub>               | 136.2 | 1095.3 | 358.373  | 1.1295   |
| 35 | 1-Hexanal                | 66251    | C <sub>6</sub> H <sub>12</sub> O              | 100.2 | 1088.2 | 353.861  | 0.522142 |
| 36 | 1-Propanol               | 71238    | C <sub>3</sub> H <sub>8</sub> O               | 60.1  | 1036   | 322.218  | 0.861225 |
| 37 | 1-Penten-3-one           | 1629589  | C <sub>5</sub> H <sub>8</sub> O               | 84.1  | 1014   | 309.702  | 0.493576 |
| 38 | 2,3-Butanedione          | 431038   | C <sub>4</sub> H <sub>6</sub> O <sub>2</sub>  | 86.1  | 1017.6 | 311.752  | 0.401    |
| 39 | 2-Butanol                | 78922    | C <sub>4</sub> H <sub>10</sub> O              | 74.1  | 1014.2 | 309.839  | 0.812746 |
| 40 | 2-Pentanone              | 107879   | C <sub>5</sub> H <sub>10</sub> O              | 86.1  | 1013.7 | 309.566  | 2.29757  |

|    |                                |          |                                               |       |        |         |          |
|----|--------------------------------|----------|-----------------------------------------------|-------|--------|---------|----------|
| 41 | 2,2,4,6,6-Pentamethylheptane-M | 13475826 | C <sub>12</sub> H <sub>26</sub>               | 170.3 | 976.8  | 289.698 | 0.469456 |
| 42 | 2,2,4,6,6-Pentamethylheptane-D | 13475826 | C <sub>12</sub> H <sub>26</sub>               | 170.3 | 977.7  | 290.192 | 1.73526  |
| 43 | 3-Methylbutanal                | 590863   | C <sub>5</sub> H <sub>10</sub> O              | 86.1  | 922    | 262.562 | 0.445584 |
| 44 | Ethyl methyl ketone            | 78933    | C <sub>4</sub> H <sub>8</sub> O               | 72.1  | 888.8  | 247.385 | 1.00608  |
| 45 | Ethanol                        | 64175    | C <sub>2</sub> H <sub>6</sub> O               | 46.1  | 924.1  | 263.549 | 0.141227 |
| 46 | Butanal                        | 123728   | C <sub>4</sub> H <sub>8</sub> O               | 72.1  | 860.1  | 234.933 | 0.587155 |
| 47 | Ethyl acetate                  | 141786   | C <sub>4</sub> H <sub>8</sub> O <sub>2</sub>  | 88.1  | 849.5  | 230.492 | 1.16914  |
| 48 | Propionaldehyde                | 123386   | C <sub>3</sub> H <sub>6</sub> O               | 58.1  | 755.2  | 194.589 | 0.453217 |
| 49 | Ethyl formate-M                | 109944   | C <sub>3</sub> H <sub>6</sub> O <sub>2</sub>  | 74.1  | 794.7  | 208.9   | 0.299637 |
| 50 | Ethyl formate-D                | 109944   | C <sub>3</sub> H <sub>6</sub> O <sub>2</sub>  | 74.1  | 796.2  | 209.462 | 0.404773 |
| 51 | 2-Methylpropanal               | 78842    | C <sub>4</sub> H <sub>8</sub> O               | 72.1  | 759.6  | 196.164 | 0.380813 |
| 52 | 2-Heptanone                    | 110430   | C <sub>7</sub> H <sub>14</sub> O              | 114.2 | 1196.4 | 481.863 | 1.52378  |
| 53 | Cyclopentanone                 | 120923   | C <sub>5</sub> H <sub>8</sub> O               | 84.1  | 1209.3 | 502.218 | 0.689867 |
| 54 | 2-Ethylfuran                   | 3208160  | C <sub>6</sub> H <sub>8</sub> O               | 96.1  | 966.9  | 284.597 | 0.81774  |
| 55 | Ethyl propanoate               | 105373   | C <sub>5</sub> H <sub>10</sub> O <sub>2</sub> | 102.1 | 969.3  | 285.833 | 0.834446 |
| 56 | 1,1-Diethoxy ethane            | 105577   | C <sub>6</sub> H <sub>14</sub> O <sub>2</sub> | 118.2 | 886.4  | 246.283 | 2.37805  |
| 57 | 3-Methyl-2-butanol             | 598754   | C <sub>5</sub> H <sub>12</sub> O              | 88.1  | 1098.8 | 361.226 | 1.66887  |
| 58 | Propyl acetate                 | 109604   | C <sub>5</sub> H <sub>10</sub> O <sub>2</sub> | 102.1 | 1007   | 305.855 | 1.01831  |
| 59 | 2-Octanone                     | 111137   | C <sub>8</sub> H <sub>16</sub> O              | 128.2 | 1295.2 | 659.437 | 0.445775 |
| 60 | 2-Methylbutanol                | 137326   | C <sub>5</sub> H <sub>12</sub> O              | 88.1  | 1198.2 | 484.629 | 0.71046  |
| 61 | Ethyl hexanoate                | 123660   | C <sub>8</sub> H <sub>16</sub> O <sub>2</sub> | 144.2 | 1230.2 | 536.824 | 1.47315  |
| 62 | Propyl butanoate               | 105668   | C <sub>7</sub> H <sub>14</sub> O <sub>2</sub> | 130.2 | 1147.8 | 417.275 | 1.51622  |
| 63 | Ethyl pentanoate               | 539822   | C <sub>7</sub> H <sub>14</sub> O <sub>2</sub> | 130.2 | 1113.8 | 377.504 | 0.525031 |
| 64 | Hexyl acetate                  | 142927   | C <sub>8</sub> H <sub>16</sub> O <sub>2</sub> | 144.2 | 1253.6 | 578.397 | 1.09504  |
| 65 | 3-Methyl-1-butanol             | 123513   | C <sub>5</sub> H <sub>12</sub> O              | 88.1  | 1244.4 | 561.705 | 0.670686 |
| 66 | 1-Penten-3-ol                  | 616251   | C <sub>5</sub> H <sub>10</sub> O              | 86.1  | 1207.8 | 499.752 | 0.464259 |
| 67 | Ethyl isobutanoate             | 97621    | C <sub>6</sub> H <sub>12</sub> O <sub>2</sub> | 116.2 | 918.2  | 260.758 | 0.180973 |
| 68 | beta-Myrcene-M                 | 123353   | C <sub>10</sub> H <sub>16</sub>               | 136.2 | 1216.5 | 513.807 | 0.951909 |
| 69 | beta-Myrcene-D                 | 123353   | C <sub>10</sub> H <sub>16</sub>               | 136.2 | 1216.7 | 514.112 | 0.70824  |
| 70 | 3-Methylpentanol               | 589355   | C <sub>6</sub> H <sub>14</sub> O              | 102.2 | 1316.5 | 691.752 | 0.575732 |

Notes: RI, retention index; Rt, retention time in the capillary GC column; the suffixes -M represents monomer, the suffixes -D represents dimer.

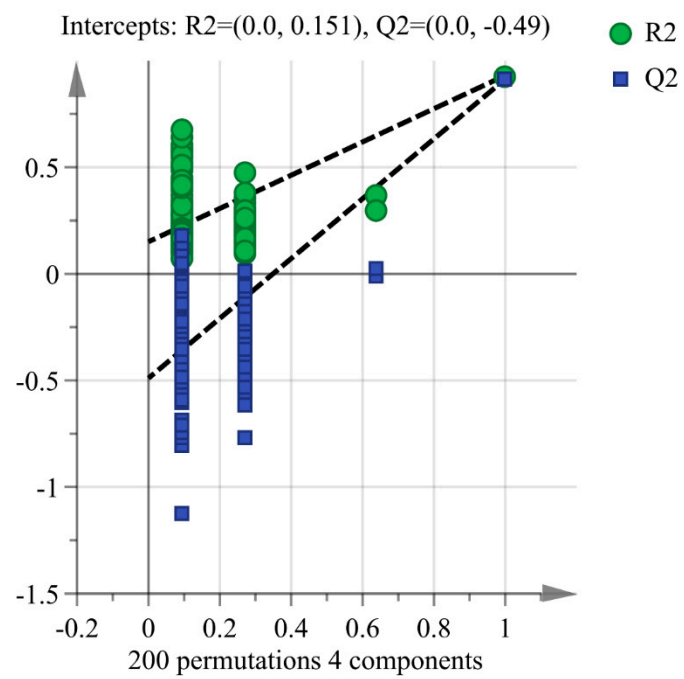

**Figure S1.** Permutation test of OPLS-DA model.

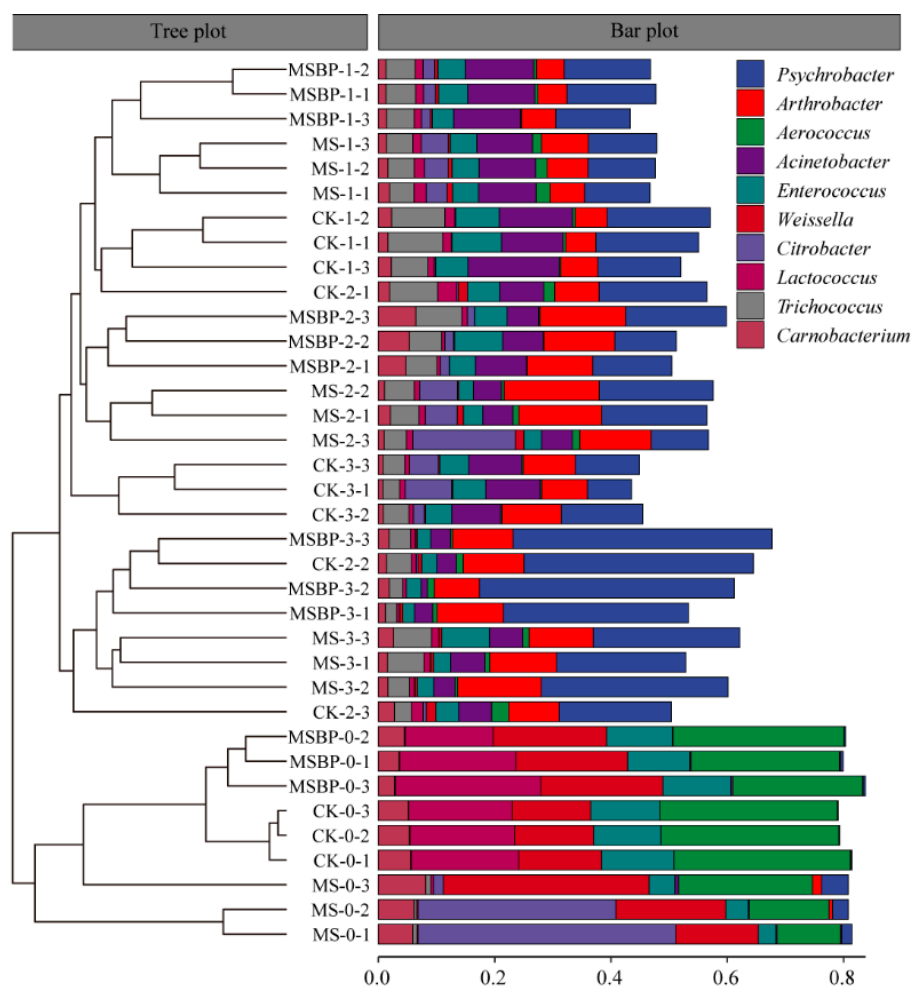

**Figure S2.** Hierarchical clustering analysis of the bacteria in pre-cooked seasoned crayfish tail during storage at room temperature.

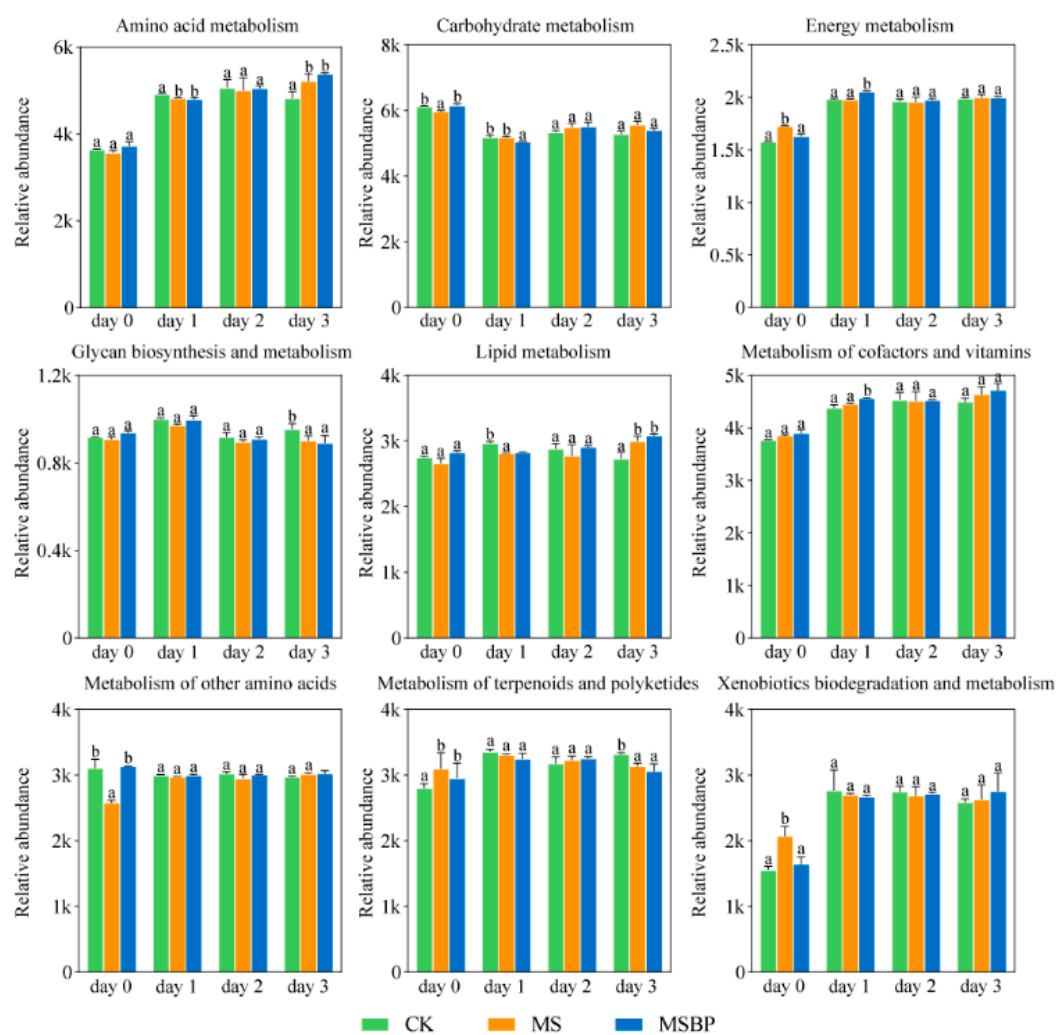

**Figure S3.** Relative abundance of KEGG metabolic pathways in pre-cooked seasoned crayfish tail with different treatments during storage at room temperature. Different letters in the figures indicate that there are significant differences between groups at the same day.
